# Supplementary material for: Molecular Survey of Rodent-Borne Infectious Agents in the Ferlo Region, Senegal
Source: MDPI journal article supplement (doi:10.3390/genes14051107), 2023-05-18
Supplement: s1 [file s1]

**Table S1.** Positive DNA controls used in this study.

| Microorganism | Name                                | Origin                                       |
|---------------|-------------------------------------|----------------------------------------------|
| Bacteria      | <i>Anaplasma phagocytophilum</i>    | Laboratory colony IHU                        |
| Bacteria      | <i>Bartonella quintana</i>          | Laboratory colony IHU                        |
| Bacteria      | <i>Bartonella</i> sp                | Laboratory colony IHU                        |
| Bacteria      | <i>Borrelia crocidurae</i>          | Laboratory colony IHU                        |
| Bacteria      | <i>Borrelia</i> sp                  | Laboratory colony IHU                        |
| Bacteria      | <i>Coxiella burnetii</i>            | Laboratory colony IHU                        |
| Bacteria      | <i>Rickettsia australis</i>         | Laboratory colony IHU                        |
| Bacteria      | <i>Rickettsia canadensis</i>        | Laboratory colony IHU                        |
| Bacteria      | <i>Rickettsia conorii</i>           | Laboratory colony IHU                        |
| Bacteria      | <i>Rickettsia felis</i>             | Laboratory colony IHU                        |
| Bacteria      | <i>Streptobacillus moniliformis</i> | Laboratory colony IHU                        |
| Bacteria      | <i>Wolbachia</i>                    | Laboratory colony IHU                        |
| Bacteria      | <i>Yersinia pestis</i>              | Laboratory colony IHU                        |
| Parasite      | <i>Leishmania</i>                   | Laboratory colony IHU                        |
| Parasite      | <i>Leishmania major</i>             | Laboratory colony IHU                        |
| Parasite      | <i>Trypanosoma congolense</i>       | Laboratory colony IHU                        |
| Parasite      | <i>Trypanosoma gambiense</i>        | Laboratory colony IHU                        |
| Parasite      | <i>Toxoplasma gondi</i>             | Positive patient DNA, IHU laboratory         |
| Parasite      | <i>Piroplasms</i>                   | DNA from positive rodents for piroplasms [1] |
